# Supplementary material for: Molybdenum and tungsten carbides can shine too
Source: Royal Society of Chemistry journal article supplement (doi:10.1039/d0cy01420f), 2020-01-01
Supplement: d0cy01420f1.pdf [file d0cy01420f1.pdf]

# Supplemental information

## **Tungsten and molybdenum carbides can shine too**

M. Führer, T. van Haasterecht and J.H. Bitter\*

### **Table of contents**

1. Table 1: Overview of potential reactions using tungsten carbides or molybdenum carbides
2. Table 2: N and S content of coals from different origins
3. References

## Supplementary Information 1

A renewed interest in HDO has arisen due to the increased use of biomass as a renewable carbon source. In general, biomass-derived feedstocks have a higher oxygen content than fossil fuels and, therefore, need to be deoxygenated. W and Mo carbides have been used in HDO reactions and compared with noble metals. Mostly model compounds such as stearic or oleic acid instead of biomass-derived oils or cresol instead of lignin-derived phenolic compounds were used as substrate.<sup>1, 2</sup> HDS and HDN reactions are usually catalysed by Ni-Mo/Al<sub>2</sub>O<sub>3</sub> and take place during the industrial refining process of petroleum feedstocks. Mo and W carbides have been shown to be valuable replacement catalysts for both reactions, HDS and HDN.<sup>3-5</sup> A classical industrial catalyst for isomerisation reactions is platinum. However, also Mo and W have shown to be valuable catalysts for isomerisation reactions. Another benefit of Mo and W, especially for isomerisation, in HDS and HDN reactions is their tolerance towards sulphur (see Table S1). Also for NH<sub>3</sub> synthesis and decomposition, Mo and W have demonstrated to be active and Mo and W carbide are suitable catalysts.

For all reactions, both supported and bulk carbide catalyst studies have been conducted. Mainly carbon and alumina were used as support. Carbonaceous materials have a large surface area and high porosity, durability and stability and therefore are attractive materials to support metal catalysts. Also, aluminium oxide is a widely used material as a support for carbides because of its mechanical and textural properties (e.g., thermal stability, high surface area, surface chemistry).<sup>6</sup> The support ensures stability of the metal particles in the catalytically active phase and enhances the downstream process.

**Table S1** Overview of potential reactions using tungsten carbides or molybdenum carbides as replacement for (noble) metal catalyst. Hydrogenation (HYD), hydrodeoxygenation (HDO), hydrodesulphurisation (HDS), hydrodenitrogenation (HDN), isomerisation and NH<sub>3</sub> synthesis/decomposition reactions are shown

| Reaction   | Catalyst                                                   | Replacement                                                                          | Feedstock                                                                                                                                                                                                                                                                                   |
|------------|------------------------------------------------------------|--------------------------------------------------------------------------------------|---------------------------------------------------------------------------------------------------------------------------------------------------------------------------------------------------------------------------------------------------------------------------------------------|
| <b>HDO</b> | Mo <sub>2</sub> C                                          | Pd, Pt, Ru, Rh, Ni, Cu                                                               | Acetic acid, <sup>7</sup> acetone, <sup>8</sup> Anisole, <sup>9-12</sup> benzofuran, <sup>4</sup> ethanol, <sup>13</sup> furfural, <sup>9, 14-16</sup> m-cresol, <sup>17</sup> methyl stearate, <sup>18</sup> phenol, <sup>11, 19</sup> propanal, <sup>20</sup> stearic acid, <sup>18</sup> |
|            | Bulk W <sub>2</sub> C                                      | Pd, Pt, Ru, Rh, Ni, Cu                                                               | acetaldehyde, <sup>21</sup> acetic acid, <sup>21</sup> benzofuran <sup>22</sup> ethylene glycol <sup>21</sup>                                                                                                                                                                               |
|            | Mo <sub>2</sub> C/C                                        | Pt, Pd, Ru, Rh (supported)                                                           | Decanal, <sup>23</sup> guaiacol, <sup>24</sup> lignin, <sup>25</sup> methoxyphenol <sup>26</sup> oleic acid, <sup>1, 27, 28</sup> stearic acid, <sup>18, 23, 29</sup> vegetable oil, <sup>18, 27, 30, 31</sup>                                                                              |
|            | Supported Mo <sub>2</sub> C/Al <sub>2</sub> O <sub>3</sub> | CoMo and NiMo supported on Al <sub>2</sub> O <sub>3</sub>                            | Acrylic acid, <sup>32</sup> benzofuran, <sup>33</sup>                                                                                                                                                                                                                                       |
|            | Supported W <sub>2</sub> C/C                               |                                                                                      | Guaiacol, <sup>24</sup> oleic acid and palmitic acid <sup>28</sup>                                                                                                                                                                                                                          |
| <b>HDS</b> | Bulk Mo <sub>2</sub> C                                     | Pt/Al <sub>2</sub> O <sub>3</sub> , MoS <sub>2</sub> /Al <sub>2</sub> O <sub>3</sub> | Dibenzothiophene <sup>4, 34</sup>                                                                                                                                                                                                                                                           |
|            | Bulk W <sub>2</sub> C                                      | Ni                                                                                   | Thiophene <sup>5</sup>                                                                                                                                                                                                                                                                      |

|                                     |           |                                                  |                                                 |                                                                                                                                                                                                                                                                                                                             |
|-------------------------------------|-----------|--------------------------------------------------|-------------------------------------------------|-----------------------------------------------------------------------------------------------------------------------------------------------------------------------------------------------------------------------------------------------------------------------------------------------------------------------------|
|                                     |           | Mo <sub>2</sub> C/AC                             | Ni-Mo/Al <sub>2</sub> O <sub>3</sub>            | Dibenzothiophene, <sup>3</sup> thiophene <sup>35</sup>                                                                                                                                                                                                                                                                      |
|                                     | Sup       | Mo <sub>2</sub> C/Al <sub>2</sub> O <sub>3</sub> | Ni                                              | Dibenzothiophene, <sup>4, 33, 34, 36</sup> hexane, <sup>37</sup> thiophene <sup>38-40</sup>                                                                                                                                                                                                                                 |
| <b>HDN</b>                          | Bulk      | Mo <sub>2</sub> C                                | sulfide Ni-Mo/Al <sub>2</sub> O <sub>3</sub>    | Amines <sup>41</sup> carbazole, <sup>42-44</sup> indole, <sup>45, 46</sup> pyridine, <sup>47</sup> quinoline <sup>48, 49</sup>                                                                                                                                                                                              |
|                                     |           | W <sub>2</sub> C                                 |                                                 | Carbazole <sup>43</sup>                                                                                                                                                                                                                                                                                                     |
|                                     | Sup       | Mo <sub>2</sub> C/Al <sub>2</sub> O <sub>3</sub> | Ni-Mo/Al <sub>2</sub> O <sub>3</sub>            | Coal-derived feeds, <sup>50, 51</sup> pyridine, <sup>52</sup> quinoline <sup>33, 52</sup>                                                                                                                                                                                                                                   |
| <b>Isomerisation</b>                |           | Mo <sub>2</sub> C/AC                             |                                                 | Indole <sup>3, 53</sup>                                                                                                                                                                                                                                                                                                     |
|                                     | Bulk      | Mo <sub>2</sub> C                                | Pt                                              | butane <sup>54, 55</sup> and heptane, <sup>56-58</sup>                                                                                                                                                                                                                                                                      |
|                                     |           | W <sub>2</sub> C                                 |                                                 | Butane, <sup>54</sup> dimethylpentane, <sup>59</sup> heptane, <sup>57, 58</sup> neopentane, <sup>59, 60</sup> nethylcyclohexane <sup>59</sup>                                                                                                                                                                               |
|                                     | S         | Mo <sub>2</sub> C/CNF                            |                                                 | Vegetable oils <sup>23</sup>                                                                                                                                                                                                                                                                                                |
| <b>HYD</b>                          |           | W <sub>2</sub> C/Al <sub>2</sub> O <sub>3</sub>  | Pt/SiO <sub>2</sub>                             | Heptane <sup>61</sup>                                                                                                                                                                                                                                                                                                       |
|                                     | Bulk      | Mo <sub>2</sub> C                                | Pt, Pd/Al <sub>2</sub> O <sub>3</sub>           | Benzene, <sup>62</sup> butane, <sup>54</sup> CO, <sup>63-65</sup> CO <sub>2</sub> , <sup>66-68</sup> ethane, <sup>69</sup> ethanol, <sup>13</sup> ethylene, <sup>70</sup> furfural, <sup>71</sup> levulinic acid, <sup>72</sup> long-chain alkadienes, <sup>73</sup> nitroarenes <sup>74</sup> , toluene, <sup>75, 76</sup> |
|                                     |           | W <sub>2</sub> C                                 | Pt                                              | Butane, <sup>54</sup> CO <sup>5, 65</sup>                                                                                                                                                                                                                                                                                   |
|                                     |           | Mo <sub>2</sub> C/CNT                            | Ru                                              | Levulinic acid <sup>77</sup>                                                                                                                                                                                                                                                                                                |
|                                     | Supported | Mo <sub>2</sub> C/Al <sub>2</sub> O <sub>3</sub> |                                                 | Benzene, <sup>78</sup> CO <sub>2</sub> , <sup>79</sup> CO, <sup>63, 80</sup> ethylene glycol <sup>81</sup>                                                                                                                                                                                                                  |
|                                     |           | W <sub>2</sub> C/C                               |                                                 | Ethylene glycol <sup>81</sup> , pentene <sup>5</sup>                                                                                                                                                                                                                                                                        |
|                                     |           |                                                  | W <sub>2</sub> C/Al <sub>2</sub> O <sub>3</sub> |                                                                                                                                                                                                                                                                                                                             |
| <b>NH<sub>3</sub> synthesis</b>     |           | α & β Mo <sub>2</sub> C                          | Iron, Mo nitride                                | (N <sub>2</sub> +3H <sub>2</sub> ) <sup>82</sup>                                                                                                                                                                                                                                                                            |
| <b>NH<sub>3</sub> decomposition</b> |           | W <sub>2</sub> C                                 | Ru, Fe NH <sub>3</sub>                          | Ammonia <sup>83-85</sup>                                                                                                                                                                                                                                                                                                    |
|                                     |           | Mo <sub>2</sub> C                                | Mo <sub>2</sub> N                               | Ammonia <sup>86, 87</sup>                                                                                                                                                                                                                                                                                                   |

## Supplementary Information 2

Table S2 lists the N and S content of coals from the following mines: the Zhundong (ZD) coal from the Xinjiang province, Yimin (YM) lignite from Inner Mongolia, Zhaotong (ZT) lignite produced in the Yunnan province and Shenmu from the Shanxi province, lignites from Mequinenza (Spain) and Labin (Croatia), highly volatile bituminous coals from Czczot and Siersza and medium volatile bituminous coal from Zofio'wka (Poland).

**Table S2** N and S content of coals from different origins

| <b>Name and origin</b>                         | <b>N (wt%)</b> | <b>S (wt%)</b> | <b>Ref.</b> |
|------------------------------------------------|----------------|----------------|-------------|
| <b>ZD_ Zhundong (Xinjiang province, China)</b> | 0.57           | 0.38           | 88          |
| <b>YM_Yimin (Mongolia)</b>                     | 0.81           | 0.13           | 88          |
| <b>ZT_haotong (Yunnan province, China)</b>     | 1.82           | 0.57           | 88          |
| <b>Shenmu (Shanxi province, China)</b>         | 1.11           | 0.34           | 89          |
| <b>Mequinenza (Spain)</b>                      | 0.80           | 10.30          | 90          |
| <b>Labin (Croatia)</b>                         | 1.20           | 10.00          | 90          |
| <b>Czczot (Poland)</b>                         | 1.00           | 1.40           | 90          |
| <b>Siersza (Poland)</b>                        | 1.10           | 1.10           | 90          |
| <b>Zofio'wka (Poland)</b>                      | 1.50           | 0.60           | 90          |

## 1. References

1. S. A. W. Hollak, R. W. Gosselink, D. S. van Es and J. H. Bitter, *Acs Catalysis*, 2013, **3**, 2837-2844.
2. C. J. Chen, W. S. Lee and A. Bhan, *Applied Catalysis A: General*, 2016, **510**, 42-48.
3. A. Celzard, J. F. Mareche, G. Furdin, V. Fierro, C. Sayag and J. Pielaszek, *Green Chemistry*, 2005, **7**, 784-792.
4. B. Dhandapani, T. S. Clair and S. Oyama, *Applied Catalysis A: General*, 1998, **168**, 219-228.
5. B. Pawelec, R. Mariscal, J. L. G. Fierro, A. Greenwood and P. T. Vasudevan, *Appl Catal a-Gen*, 2001, **206**, 295-307.
6. U. Hanefeld and L. Lefferts, *Catalysis: An Integrated Textbook for Students*, John Wiley & Sons, 2018.
7. A. Kumar, S. Phadke and A. Bhan, *Catalysis Science and Technology*, 2018, **8**, 2938-2953.
8. M. M. Sullivan and A. Bhan, *ACS Catalysis*, 2016, **6**, 1145-1152.
9. W.-S. Lee, Z. Wang, R. J. Wu and A. Bhan, *Journal of Catalysis*, 2014, **319**, 44-53.
10. W.-S. Lee, A. Kumar, Z. Wang and A. Bhan, *ACS Catalysis*, 2015, **5**, 4104-4114.
11. C. J. Chen, W. S. Lee and A. Bhan, *Abstr Pap Am Chem S*, 2016, **251**.
12. A. Kumar and A. Bhan, *Chemical Engineering Science*, 2019, **197**, 371-378.
13. T. G. Kelly and J. G. G. Chen, *Green Chemistry*, 2014, **16**, 777-784.
14. J. R. McManus and J. M. Vohs, *Surf Sci*, 2014, **630**, 16-21.
15. K. Xiong, W. S. Lee, A. Bhan and J. G. Chen, *ChemSusChem*, 2014, **7**, 2146-2149.
16. Y. Shi, Y. Yang, Y. W. Li and H. Jiao, *Catalysis Science and Technology*, 2016, **6**, 4923-4936.
17. C. J. Chen and A. Bhan, *Acs Catalysis*, 2017, **7**, 1113-1122.
18. J. Han, J. Duan, P. Chen, H. Lou and X. Zheng, *Advanced Synthesis and Catalysis*, 2011, **353**, 2577-2583.
19. J. Engelhardt, P. Lyu, P. Nachtigall, F. Schüth and Á. M. García, *ChemCatChem*, 2017, **9**, 1985-1991.
20. H. Ren, W. Yu, M. Saliccioli, Y. Chen, Y. Huang, K. Xiong, D. G. Vlachos and J. G. Chen, *ChemSusChem*, 2013, **6**, 798-801.
21. W. T. Yu, Z. J. Mellinger, M. A. Barteau and J. G. G. Chen, *Journal of Physical Chemistry C*, 2012, **116**, 5720-5729.
22. R. Liu, M. Pang, X. Chen, C. Li, C. Xu and C. Liang, *Catalysis Science and Technology*, 2017, **7**, 1333-1341.
23. J. Han, J. Duan, P. Chen, H. Lou, X. Zheng and H. Hong, *Green Chemistry*, 2011, **13**, 2561-2568.
24. A. L. Jongerius, R. W. Gosselink, J. Dijkstra, J. H. Bitter, P. C. A. Bruijninx and B. M. Weckhuysen, *ChemCatChem*, 2013, **5**, 2964-2972.
25. A. L. Jongerius, P. C. A. Bruijninx and B. M. Weckhuysen, *Green Chemistry*, 2013, **15**, 3049-3056.
26. S. D. Liu, H. Y. Wang, K. J. Smith and C. S. Kim, *Energy & Fuels*, 2017, **31**, 6378-6388.
27. S. K. Kim, D. Yoon, S. C. Lee and J. Kim, *ACS Catalysis*, 2015, **5**, 3292-3303.
28. F. Wang, J. C. Jiang, K. Wang, Q. L. Zhai, H. Sun, P. Liu, J. F. Feng, H. H. Xia, J. Ye, Z. X. Li, F. L. Li and J. M. Xu, *Fuel*, 2018, **228**, 103-111.

29. L. Souza Macedo, R. R. Oliveira, T. van Haasterecht, V. Teixeira da Silva and H. Bitter, *Applied Catalysis B: Environmental*, 2019, **241**, 81-88.
30. Y. Qin, P. Chen, J. Z. Duan, J. X. Han, H. Lou, X. M. Zheng and H. P. Hong, *Rsc Advances*, 2013, **3**, 17485-17491.
31. Y. Qin, L. He, J. Duan, P. Chen, H. Lou, X. Zheng and H. Hong, *ChemCatChem*, 2014, **6**, 2698-2705.
32. A. S. Rocha, L. A. Souza, R. R. Oliveira, A. B. Rocha and V. Teixeira da Silva, *Applied Catalysis A: General*, 2017, **531**, 69-78.
33. G. Dolce, P. Savage and L. Thompson, *Energy & Fuels*, 1997, **11**, 668-675.
34. H. K. Park, D. S. Kim and K. L. Kim, *Korean Journal of Chemical Engineering*, 1998, **15**, 625-630.
35. E. Puello-Polo, A. Gutierrez-Alejandre, G. Gonzalez and J. L. Brito, *Catalysis Letters*, 2010, **135**, 212-218.
36. G. Jin, J. Zhu, X. Fan, G. Sun and J. Gao, *Chinese Journal of Catalysis*, 2006, **27**, 899-903.
37. Q. L. Zhu, X. T. Zhao, Z. M. Zhao, H. J. Ma and Y. Q. Deng, *Chinese Journal of Catalysis*, 2005, **26**, 1047-1052.
38. J. S. Lee and M. Boudart, *Appl Catal*, 1985, **19**, 207-210.
39. P. A. Aegerter, W. W. C. Quigley, G. J. Simpson, D. D. Ziegler, J. W. Logan, K. R. McCrea, S. Glazier and M. E. Bussell, *Journal of Catalysis*, 1996, **164**, 109-121.
40. K. R. McCrea, J. W. Logan, T. L. Tarbuck, J. L. Heiser and M. E. Bussell, *Journal of Catalysis*, 1997, **171**, 255-267.
41. V. Schwartz, V. T. da Silva and S. T. Oyama, *Journal of Molecular Catalysis A: Chemical*, 2000, **163**, 251-268.
42. A. Szymańska, M. Lewandowski, C. Sayag and G. Djéga-Mariadassou, *Journal of Catalysis*, 2003, **218**, 24-31.
43. A. Szymanska-Kolasa, M. Lewandowski, C. Sayag, D. Brodzki and G. Djéga-Mariadassou, *Catal Today*, 2007, **119**, 35-38.
44. M. Lewandowski, A. Szymańska-Kolasa, P. Da Costa and C. Sayag, *Catal Today*, 2007, **119**, 31-34.
45. S. Z. Li and J. S. Lee, *Journal of Catalysis*, 1998, **173**, 134-144.
46. A. Kotarba, G. Adamski, W. Piskorz, Z. Sojka, C. Sayag and G. Djéga-Mariadassou, *J Phys Chem B*, 2004, **108**, 2885-2892.
47. J. G. Choi, J. R. Brenner and L. T. Thompson, *Journal of Catalysis*, 1995, **154**, 33-40.
48. J. C. Schlatter, S. T. Oyama, J. E. Metcalfe III and J. M. Lambert Jr, *Ind Eng Chem Res*, 1988, **27**, 1648-1653.
49. S. Ramanathan and S. T. Oyama, *J Phys Chem-US*, 1995, **99**, 16365-16372.
50. D. J. Sajkowski and S. T. Oyama, *Applied Catalysis A: General*, 1996, **134**, 339-349.
51. D. J. Sajkowski and S. T. Oyama, 1990.
52. G. M. Dolce and L. T. Thompson, 1997.
53. C. Sayag, M. Benkhaled, S. Suppan, J. Trawczynski and G. Djéga-Mariadassou, *Applied Catalysis A: General*, 2004, **275**, 15-24.
54. M. K. Neylon, S. Choi, H. Kwon, K. E. Curry and L. T. Thompson, *Applied Catalysis A: General*, 1999, **183**, 253-263.
55. S. Liebig, T. Gerlach, K. Doukkali and W. Grünert, *Studies in Surface Science and Catalysis*, 2000, **130 C**, 2369-2374.

56. E. A. Blekkan, C. Pham-Huu, M. J. Ledoux and J. Guille, *Industrial and Engineering Chemistry Research*, 1994, **33**, 1657-1664.
57. A.-F. Lamic, T. L. H. Pham, C. Potvin, J.-M. Manoli and G. Djéga-Mariadassou, *Journal of Molecular Catalysis A: Chemical*, 2005, **237**, 109-114.
58. A. F. Lamic, C. H. Shin, G. Djéga-Mariadassou and C. Potvin, *Applied Catalysis A: General*, 2006, **302**, 5-13.
59. F. H. Ribeiro, R. A. D. Betta, M. Boudart, J. Baumgartner and E. Iglesia, *Journal of Catalysis*, 1991, **130**, 86-105.
60. E. Iglesia, F. H. Ribeiro, M. Boudart and J. E. Baumgartner, *Catal Today*, 1992, **15**, 307-337.
61. E. Iglesia, J. E. Baumgartner, F. H. Ribeiro and M. Boudart, *Journal of Catalysis*, 1991, **131**, 523-544.
62. R. R. Oliveira Jr, A. S. Rocha, V. Teixeira Da Silva and A. B. Rocha, *Applied Catalysis A: General*, 2014, **469**, 139-145.
63. H. G. Kim, K. H. Lee and J. S. Lee, *Research on Chemical Intermediates*, 2000, **26**, 427-443.
64. K. Z. Qi, G. C. Wang and W. J. Zheng, *Surf Sci*, 2013, **614**, 53-63.
65. G. S. Ranhotra, G. W. Haddix, A. T. Bell and J. A. Reimer, *Journal of Catalysis*, 1987, **108**, 24-39.
66. H. Tominaga and M. Nagai, *Applied Catalysis A: General*, 2005, **282**, 5-13.
67. S. Posada-Pérez, F. Viñes, P. J. Ramirez, A. B. Vidal, J. A. Rodriguez and F. Illas, *Physical Chemistry Chemical Physics*, 2014, **16**, 14912-14921.
68. W. Xu, P. J. Ramirez, D. Stacchiola and J. A. Rodriguez, *Catalysis Letters*, 2014, **144**, 1418-1424.
69. S. Yao, B. Yan, Z. Jiang, Z. Liu, Q. Wu, J. H. Lee and J. G. Chen, *ACS Catalysis*, 2018, **8**, 5374-5381.
70. F. Gao, Y. Wang and W. T. Tysoe, *Journal of Molecular Catalysis A: Chemical*, 2006, **249**, 111-122.
71. Y. C. Deng, R. Gao, L. L. Lin, T. Liu, X. D. Wen, S. Wang and D. Ma, *J Am Chem Soc*, 2018, **140**, 14481-14489.
72. J. Quiroz, E. F. Mai and V. T. Da Silva, *Topics in Catalysis*, 2016, **59**, 148-158.
73. Y. Li, Y. Fan and G. Luo, *Industrial and Engineering Chemistry Research*, 2004, **43**, 1334-1339.
74. Z. Liu, X. Wang, X. Zou and X. Lu, *ChemistrySelect*, 2018, **3**, 5165-5168.
75. M. L. Frauwallner, F. López-Linares, J. Lara-Romero, C. E. Scott, V. Ali, E. Hernández and P. Pereira-Almao, *Applied Catalysis A: General*, 2011, **394**, 62-70.
76. A. Mehdad, R. E. Jentoft and F. C. Jentoft, *Journal of Catalysis*, 2017, **347**, 89-101.
77. E. F. Mai, M. A. Machado, T. E. Davies, J. A. Lopez-Sanchez and V. Teixeira Da Silva, *Green Chemistry*, 2014, **16**, 4092-4097.
78. J. S. Lee, M. H. Yeom, K. Y. Park, I. S. Nam, J. S. Chung, Y. G. Kim and S. H. Moon, *Journal of Catalysis*, 1991, **128**, 126-136.
79. M. Nagai, T. Kurakami and S. Omi, *Catal Today*, 1998, **45**, 235-239.
80. H. Shou and R. J. Davis, *Journal of Catalysis*, 2013, **306**, 91-99.
81. N. Ji, T. Zhang, M. Zheng, A. Wang, H. Wang, X. Wang, Y. Shu, A. L. Stottlemeyer and J. G. Chen, *Catal Today*, 2009, **147**, 77-85.
82. R. Kojima and K. I. Aika, *Applied Catalysis A: General*, 2001, **219**, 141-147.

83. S. S. Pansare, W. Torres and J. G. Goodwin, *Catalysis Communications*, 2007, **8**, 649-654.
84. S. S. Pansare, W. Torres, J. G. Goodwin Jr and S. K. Gangwal, 2006, ACS National Meeting Book of Abstracts, 231.
85. S. S. Pansare and J. G. Goodwin, *Ind Eng Chem Res*, 2008, **47**, 4063-4070.
86. W. Zheng, T. P. Cotter, P. Kaghazchi, T. Jacob, B. Frank, K. Schlichte, W. Zhang, D. S. Su, F. Schüth and R. Schlögl, *J Am Chem Soc*, 2013, **135**, 3458-3464.
87. J. G. Choi, *Journal of Catalysis*, 1999, **182**, 104-116.
88. Z. Wang, Q. Li, Z. Lin, R. Whiddon, K. Qiu, M. Kuang and K. Cen, *Fuel*, 2016, **164**, 254-261.
89. J. Hou, Y. Ma, S. Li, J. Shi, L. He and J. Li, *Fuel*, 2018, **231**, 134-144.
90. T. Grzybek, R. Pietrzak and H. Wachowska, *Fuel Processing Technology*, 2002, **77**, 1-7.
